# Supplementary material for: Regeneration of anode materials from complex graphite residue in spent lithium-ion battery recycling process
Source: Royal Society of Chemistry journal article supplement (doi:10.1039/d2gc02439j), 2022-01-01
Supplement: d2gc02439j1.pdf [file d2gc02439j1.pdf]

## Supporting Information

### Regeneration of anode materials from complex graphite residue in spent lithium-ion battery recycling process

Table S1 □ Element composition of GR by XRF

| Element        | Cu   | Al   | Ca   | Fe   | Ni   | Co   | Mn   | Li   | Si   | Ti   | Zr   |
|----------------|------|------|------|------|------|------|------|------|------|------|------|
| Content (wt.%) | 0.01 | 0.37 | 0.76 | 0.08 | 0.12 | 0.34 | 2.78 | 0.02 | 1.01 | 0.05 | 0.19 |

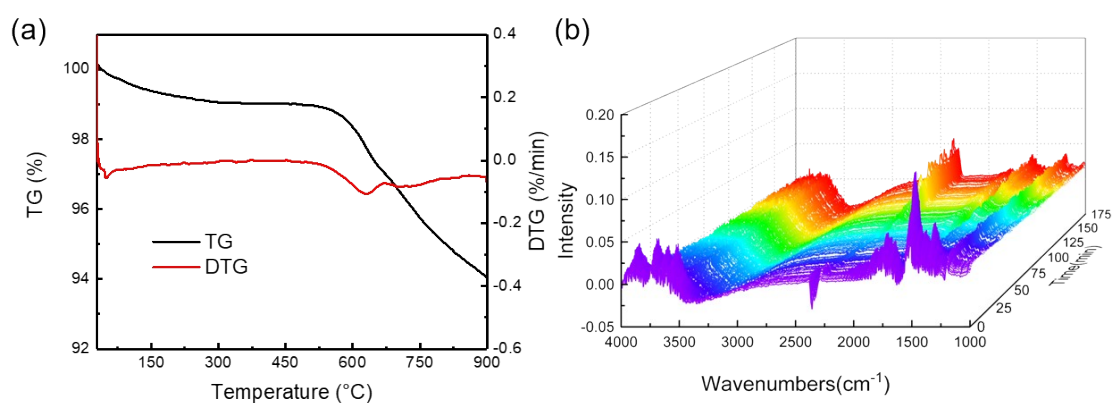

Figure S1 (a) Thermogravimetry (TG) and differential thermal analysis (DTA) of GR in argon; (b) Thermogravimetric infrared of GR in argon.

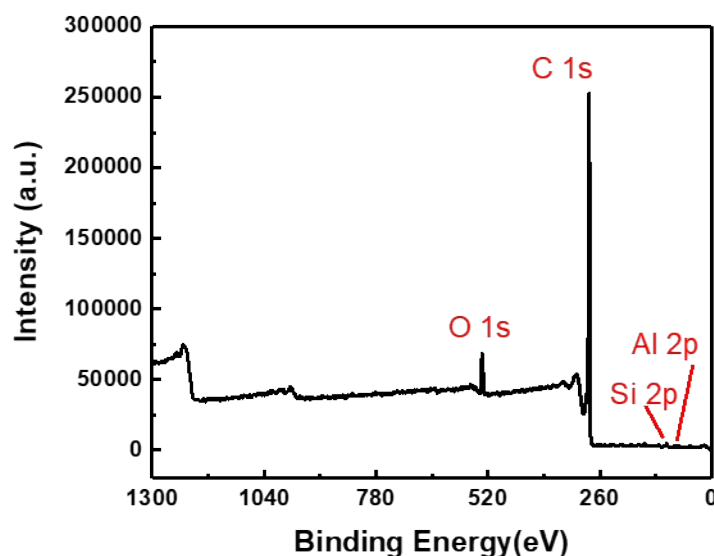

Figure S2 XPS spectra of GR.

The Environment-economic impacts of the process are calculated from the end of the pretreatment.

**Table S2 Environmental-economic relevant data of the proposed process in this work**

| Technology                                          | Raw material   | CO <sub>2</sub> (g) | NO <sub>x</sub> (g) | SO <sub>x</sub> (g) | Total energy (MJ) | Water (L) | Profit (\$) |
|-----------------------------------------------------|----------------|---------------------|---------------------|---------------------|-------------------|-----------|-------------|
| Leaching & Extraction (solid-to-liquid ratio 10g/L) | Spent LIBs 1kg | 102.76              | 0.80                | 5.38                | 0.60              | 10.32     |             |
| Alkali swelling                                     | Graphite 0.2kg | 111.00              | 0.11                | 0.06                | 10.99             | 1.23      | -2.21       |
| Hydrochloric acid leaching                          | Graphite 0.2kg | 368.60              | 0.32                | 0.17                | 6.50              | 2.88      |             |
| Restore structure                                   | Graphite 0.2kg | -                   | -                   | -                   | 27.00             | -         |             |
| Product                                             |                |                     |                     |                     |                   |           | +4.71       |
| Total                                               |                | 582.37              | 1.22                | 5.61                | 45.09             | 14.44     | +2.50       |

- 1、 Leaching & Extraction: The raw material 1kg spent LIBs, solid-liquid ratio set to 10g/L, requires 10L of 1mol/L sulfuric acid solution. The CO<sub>2</sub>, NO<sub>x</sub>, SO<sub>x</sub>, energy and water consumed from the process and the preparation of the raw material are available by searching in the GREET software, as shown in Table S2 (GREET is a traditional multidimensional model that provides a comprehensive, life-cycle-based approach to compare the energy use and emissions of conventional and advanced vehicle technologies. It includes Vehicle-Cycle Model (evaluates the energy and emission effects associated with vehicle material recovery and production, vehicle component fabrication, vehicle assembly, and vehicle disposal/recycling)).
- 2、 Alkali swelling: Set each 1kg spent LIBs contains 20% of anode graphite, so set the raw material for this step is 0.2kg graphite, according to the addition of 10wt.% NaOH in this paper, 0.06kg of sodium

hydroxide solid is needed, and at the same time, high temperature roasting at 500°C for 3h is needed, and the search in GREET software shows the process and the raw material preparation generated CO<sub>2</sub>, NO<sub>x</sub>, SO<sub>x</sub>, the energy and water consumed, as shown in Table S2.

- 3、 Hydrochloric acid leaching: The material loss in the swelling process is small and negligible relative to the total amount, so the raw material is still set to 0.2kg of graphite for this step, and the solid-liquid ratio is set to 10g/L, requiring 2L of 1mol/L hydrochloric acid solution, which can be looked up in the GREET software to know the process and the raw material preparation of CO<sub>2</sub>, NO<sub>x</sub>, SO<sub>x</sub>, energy and water consumed, as shown in Table S2.
- 4、 Restore structure: The material loss in the leaching process is small and negligible compared to the total amount, so the raw material is still set at 0.2 kg of graphite for this step, which needs to be heated at 2600°C for 2 h. The energy consumed in the process can be found by looking up in the GREET software, as shown in Table S2.
- 5、 The total energy consumed by the above process is combined and converted into electrical energy consumption, and the energy consumption cost is calculated according to the Chinese commercial electricity consumption of 0.15\$ / (kW h), and the total expenditure is calculated by combining the cost of reagents used (query in GREET software).
- 6、 Based on the ratio of each component in the LIB, Li 1.9%; Co 3%; Ni 12.1% and graphite anode material 20%, the yield of the product obtained (price per kg of material from GREET software) is calculated and the results are shown in the Product row in Table S2.
- 7、 Finally, the above components are summed to obtain the total gas emissions, energy and water consumption, and total benefits, as shown in Table S2.

**Table S3 Environmental-economic relevant data of Partially-recovery technology**

| Technology                                          | Raw material   | CO <sub>2</sub> (g) | NO <sub>x</sub> (g) | SO <sub>x</sub> (g) | Total energy (MJ) | Water (L) | Profit (\$) |
|-----------------------------------------------------|----------------|---------------------|---------------------|---------------------|-------------------|-----------|-------------|
| Leaching & Extraction (solid-to-liquid ratio 10g/L) | Spent LIBs 1kg | 102.76              | 0.80                | 5.38                | 0.60              | 10.32     | -1.68       |
| Burning                                             | Graphite 0.2kg | 822.19              | 2.80                | 2.22                | 36.00             | 4.74      |             |
| Product                                             |                |                     |                     |                     |                   |           | +3.97       |
| Total                                               |                | 924.95              | 3.60                | 7.60                | 36.60             | 15.06     | +2.29       |

- 1、 Leaching & Extraction: Same as Note 1 of Table S2.
- 2、 Burning: It is set that each 1kg of spent LIBs contains 20% of anode graphite, so the raw material for this step is set to be 0.2kg of graphite, and heated at 750°C in air for 3h. The CO<sub>2</sub>, NO<sub>x</sub>, SO<sub>x</sub>, energy consumed, and water produced by this process can be found by searching in the GREET software, as shown in Table S3.
- 3、 The total energy consumed by the above process is combined and converted into electrical energy consumption, and the energy consumption cost is calculated according to the Chinese commercial electricity consumption of 0.15\$ / (kW h), and the total expenditure is calculated by combining the cost of reagents used (query in GREET software).
- 4、 Based on the ratio of each component in the LIB, Li 1.9%; Co 3%; Ni 12.1%, the yield of the product

obtained (price per kg of material from GREET software) is calculated and the results are shown in the Product row in Table S3.

- Finally, the above components are summed to obtain the total gas emissions, energy and water consumption, and total benefits, as shown in Table S3.

**Table S4 Environmental-economic relevant data of Separation-recovery technology**

| Technology        | Raw material             | CO <sub>2</sub> (g) | NO <sub>x</sub> (g) | SO <sub>x</sub> (g) | Total energy (MJ) | Water (L) | Profit (\$) |
|-------------------|--------------------------|---------------------|---------------------|---------------------|-------------------|-----------|-------------|
| Separation        | Spent LIBs 1kg           | -                   | -                   | -                   | 36.00             | 10.00     |             |
| Purification      | cathode materials 0.35kg | 151.47              | 0.31                | 2.68                | 0.30              | 5.16      | -2.02       |
| Purification      | Anode material 0.35kg    | 351.30              | 0.49                | 3.70                | 0.30              | 5.16      |             |
| Restore structure | Graphite 0.2kg           | -                   | -                   | -                   | 27.00             | -         |             |
| Product           |                          |                     |                     |                     |                   |           | +3.94       |
| Total             |                          | 502.77              | 0.80                | 6.38                | 63.60             | 20.32     | +1.92       |

- Separation: Set each 1kg spent LIBs contains 35% of cathode material, 20% of anode graphite and 15% of copper foil, and 30% of other (including battery shell, electrolyte, etc.), the above materials are separated by flotation, and the energy and water consumed by the process can be found by searching in GREET software, as shown in Table S4.
- Purification: The purification of 0.35 kg of cathode material obtained after the above flotation, with the solid-liquid ratio set at 10 g/L, required 3.5 L of 1 mol/L sulfuric acid solution, 0.2 L of hydrogen peroxide solution, and heating at 80°C for 2 h. The process and the raw material preparation generated CO<sub>2</sub>, NO<sub>x</sub>, SO<sub>x</sub>, energy and water consumed can be found by looking up in the GREET software, as shown in Table S4.
- Purification: The 0.35 kg of anode material (including graphite and copper foil) obtained after the above flotation was purified, and the solid-liquid ratio was set to 10 g/L, requiring 3.5 L of 1 mol/L sulfuric acid solution, 0.2 L of hydrogen peroxide solution, and heating at 80°C for 2 h. The process and the raw material preparation generated CO<sub>2</sub>, NO<sub>x</sub>, SO<sub>x</sub>, energy and water consumption can be found by searching in the GREET software, as shown in Table S4.
- Restore structure: Same as Note 4 of Table S2.
- The total energy consumed by the above process is combined and converted into electrical energy consumption, and the energy consumption cost is calculated according to the Chinese commercial electricity consumption of 0.15\$/ (kW h), and the total expenditure is calculated by combining the cost of reagents used (query in GREET software).
- Based on the ratio of each component in the LIB, Li 1.9%; Co 3%; Ni 12.1% and graphite anode material 20%, the yield of the product obtained (price per kg of material from GREET software) is calculated and the results are shown in the Product row in Table S4.
- Finally, the above components are summed to obtain the total gas emissions, energy and water consumption, and total benefits, as shown in Table S4.
